# Supplementary material
Source: PubMed Central journal article supplement (PMC8664929)
Supplement: NIHMS1694764-supplement-1.pdf [file NIHMS1694764-supplement-1.pdf]

**Number of interactions**

| INHIBITORY |       | ACTIVATING |         |
|------------|-------|------------|---------|
| KIR        | HLA   | KIR        | HLA     |
| 2DL1       | C2    | 2DS1       | C2      |
| 2DL2       | C1    | 2DS2       | C*16    |
| 2DL2       | C2    | 2DS4       | A*11    |
| 2DL3       | C1    | 2DS4       | C*01:02 |
| 3DL1       | B-Bw4 | 2DS4       | C*14:02 |
| 3DL1       | A-Bw4 | 2DS4       | C*16:01 |
| 3DL2       | A*03  | 2DS4       | C*02:02 |
| 3DL2       | A*11  | 2DS4       | C*05:01 |
|            |       | 2DS4       | C*04:01 |
|            |       | 2DS5*003   | C2      |
|            |       | 2DS5*004   | C2      |
|            |       | 2DS5*005   | C2      |
|            |       | 2DS5*006   | C2      |
|            |       | 2DS5*007   | C2      |
|            |       | 2DS5*008   | C2      |

Scoring matrix for counting number of interactions as previously described (21-23). HLA alleles were coded for their KIR ligand status (C1, C2, B-Bw4, A-Bw4) for those interactions involving only ligand status. For those with specific allotype designation, e.g. A\*03, A\*11, all alleles in those groups were counted. Homozygous interactions were counted twice.

**Telomeric interactions**

| HLA     | KIR3DL1 group |      |      |      |
|---------|---------------|------|------|------|
|         | K015          | K001 | K005 | K004 |
| B*57:01 | 74.5          | 76.8 | 77.0 | 0    |
| A*32:01 | 67.6          | 62.3 | 44.6 | 0    |
| B*58:01 | 61.9          | 70.1 | 61.9 | 0    |
| B*53:01 | 54.8          | 60.8 | 52.4 | 0    |
| B*49:01 | 54.4          | 63.0 | 54.5 | 0    |
| B*57:03 | 49.9          | 68.6 | 58.5 | 0    |
| B*38:01 | 37.6          | 51.8 | 47.4 | 0    |
| B*15:13 | 25.1          | 40.9 | 36.5 | 0    |
| B*15:16 | 25.0          | 35.3 | 31.3 | 0    |
| B*51:02 | 24.8          | 34.7 | 32.6 | 0    |
| B*51:01 | 23.7          | 32.4 | 31.0 | 0    |
| B*59:01 | 22.4          | 37.7 | 34.3 | 0    |
| B*44:03 | 20.1          | 35.7 | 62.8 | 0    |
| B*47:01 | 18.9          | 35.9 | 39.6 | 0    |
| B*44:02 | 17.6          | 24.5 | 35.6 | 0    |
| A*24:03 | 13.6          | 26.8 | 39.4 | 0    |
| B*52:01 | 11.9          | 21.6 | 18.6 | 0    |
| C*16:01 | 11.1          | 3.8  | 4.5  | 0    |
| C*04:01 | 9.8           | 6.6  | 5.1  | 0    |
| C*07:02 | 7.7           | 8.5  | 4.3  | 0    |
| A*24:02 | 6.9           | 24.0 | 36.7 | 0    |
| B*37:01 | 5.5           | 18.0 | 27.1 | 0    |
| C*14:02 | 5.5           | 3.4  | 4.2  | 0    |
| C*02:02 | 5.3           | 3.2  | 3.2  | 0    |
| C*01:02 | 0.8           | 5.2  | 4.9  | 0    |
| A*23:01 | 0.0           | 3.9  | 18.4 | 0    |
| B*27:05 | 0.0           | 5.3  | 16.4 | 0    |
| B*13:01 | 0.0           | 0.0  | 7.0  | 0    |

Cen and Tel interaction scores used the 'Telomeric Interactions' and 'Centromeric Interactions' scoring matrices. The results were summed for the composite interaction score. The centromeric interaction values were obtained from published binding studies where they were reported as absolute binding values. The values for low expressing alleles were multiplied by 0.5 to account for the expression level difference. Telomeric interaction scores were taken from Saunders et al along with allele assignment to one of four groups (K001, K004, K005, K015). These values were reported as percent of maximum and were normalized to the centromeric values so that the 100% score of Saunders was equivalent to the maximum centromeric value. KIR and/or HLA of the donor and/or recipient were given the value of the closest allele if they did not appear in the matrix. In homozygous individuals the interaction was counted twice, once for each of the homozygous alleles.

Example calculation.

**Donor KIR:** 2DL2\*003|2DL3\*002|2DL1\*002|3DL1\*001/009 (K001/K001)  
**Recipient HLA:** A\*01:01/03:01|B\*07:02/44:03|C\*07:02/16:01

**Cen** 19+7+12+0 = 38 Avg. = 38/4 = 9.5

**Tel** 35.7+35.7+8.5+8.5+3.8+3.8 = 98

Avg. = 98/6 = 16.33

**Combined** 38+98 = 136 Avg. = 136/10 = 13.6

**Centromeric interactions**

|        | Allotype | C1      |         |         |         |         |         |         |         |         | C2      |         |         |         |         |         |         |  |  |
|--------|----------|---------|---------|---------|---------|---------|---------|---------|---------|---------|---------|---------|---------|---------|---------|---------|---------|--|--|
|        |          | C*01:02 | C*03:02 | C*03:03 | C*03:04 | C*07:02 | C*08:01 | C*12:03 | C*14:02 | C*16:01 | C*02:02 | C*04:01 | C*05:01 | C*06:02 | C*15:02 | C*17:01 | C*18:02 |  |  |
| 2DL2/3 | 2*001    | 20      | 28      | 44      | 50      | 22      | 34      | 14      | 18      | 12      | 17      | 7       | 14      | 17      | 30      | 9       | 20      |  |  |
|        | 2*002    | 20      | 28      | 44      | 50      | 22      | 34      | 14      | 18      | 12      | 17      | 7       | 14      | 17      | 30      | 9       | 20      |  |  |
|        | 2*003    | 17      | 21      | 26      | 38      | 19      | 23      | 12      | 13      | 7       | 1       | 1       | 2       | 4       | 14      | 3       | 8       |  |  |
|        | 2*004    | 0       | 0       | 0       | 0       | 0       | 0       | 0       | 0       | 0       | 0       | 0       | 0       | 0       | 0       | 0       | 0       |  |  |
|        | 2*005    | 20      | 28      | 44      | 50      | 22      | 34      | 14      | 18      | 12      | 17      | 7       | 14      | 17      | 30      | 9       | 20      |  |  |
|        | 2*006    | 13      | 21      | 27      | 37      | 15      | 21      | 10      | 11      | 4       | 4       | 2       | 2       | 3       | 12      | 1       | 4       |  |  |
|        | 2*007    | 20      | 28      | 44      | 50      | 22      | 34      | 14      | 18      | 12      | 17      | 7       | 14      | 17      | 30      | 9       | 20      |  |  |
|        | 2*008    | 10      | 14      | 22      | 25      | 11      | 17      | 7       | 9       | 6       | 8.5     | 3.5     | 7       | 8.5     | 15      | 4.5     | 10      |  |  |
|        | 2*009    | 24      | 41      | 49      | 51      | 28      | 43      | 15      | 21      | 13      | 15      | 4       | 12      | 19      | 26      | 8       | 20      |  |  |
|        | 2*010    | 10      | 14      | 22      | 25      | 11      | 17      | 7       | 9       | 6       | 8.5     | 3.5     | 7       | 8.5     | 15      | 4.5     | 10      |  |  |
|        | 2*011    | 15      | 21      | 28      | 36      | 18      | 25      | 12      | 13      | 8       | 3       | 1       | 4       | 2       | 12      | 2       | 3       |  |  |
|        | 3*001    | 7       | 21      | 27      | 30      | 12      | 21      | 1       | 3       | 0       | 3       | 1       | 1       | 2       | 2       | 2       | 3       |  |  |
|        | 3*002    | 7       | 21      | 27      | 30      | 12      | 21      | 1       | 3       | 0       | 3       | 1       | 1       | 2       | 2       | 2       | 3       |  |  |
|        | 3*003    | 7       | 21      | 27      | 30      | 12      | 21      | 1       | 3       | 0       | 3       | 1       | 1       | 2       | 2       | 2       | 3       |  |  |
|        | 3*004    | 14      | 21      | 26      | 30      | 18      | 22      | 2       | 11      | 3       | 3       | 0       | 1       | 2       | 5       | 1       | 3       |  |  |
|        | 3*005    | 14      | 21      | 26      | 30      | 18      | 22      | 2       | 11      | 3       | 3       | 0       | 1       | 2       | 5       | 1       | 3       |  |  |
|        | 3*006    | 7       | 21      | 27      | 30      | 12      | 21      | 1       | 3       | 0       | 3       | 1       | 1       | 2       | 2       | 2       | 3       |  |  |
|        | 3*007    | 7       | 21      | 27      | 30      | 12      | 21      | 1       | 3       | 0       | 3       | 1       | 1       | 2       | 2       | 2       | 3       |  |  |
| 3*008N | 0        | 0       | 0       | 0       | 0       | 0       | 0       | 0       | 0       | 0       | 0       | 0       | 0       | 0       | 0       | 0       |         |  |  |
| 3*009  | 3        | 21      | 24      | 28      | 12      | 23      | 0       | 1       | 0       | 0       | 0       | 0       | 2       | 1       | 1       | 2       |         |  |  |
| 3*010  | 14       | 21      | 26      | 30      | 18      | 22      | 2       | 11      | 3       | 3       | 0       | 1       | 2       | 5       | 1       | 3       |         |  |  |
| 3*011  | 8        | 22      | 27      | 32      | 14      | 21      | 2       | 2       | 2       | 2       | 0       | 1       | 2       | 4       | 1       | 1       |         |  |  |
| 3*012  | 7        | 21      | 27      | 30      | 12      | 21      | 1       | 3       | 0       | 3       | 1       | 1       | 2       | 2       | 2       | 3       |         |  |  |
| 3*013  | 6        | 21      | 27      | 30      | 10      | 21      | 2       | 3       | 0       | 3       | 0       | 0       | 0       | 1       | 1       | 2       |         |  |  |
| 3*014  | 24       | 41      | 49      | 54      | 29      | 41      | 17      | 22      | 14      | 1       | 0       | 4       | 2       | 9       | 2       | 3       |         |  |  |
| 3*015  | 12       | 22      | 26      | 32      | 21      | 21      | 2       | 5       | 3       | 3       | 2       | 2       | 2       | 5       | 1       | 4       |         |  |  |
| 3*016  | 24       | 41      | 50      | 57      | 33      | 42      | 16      | 21      | 17      | 4       | 1       | 2       | 5       | 15      | 3       | 12      |         |  |  |
| 3*017  | 24       | 41      | 49      | 54      | 29      | 41      | 17      | 22      | 14      | 1       | 0       | 4       | 2       | 9       | 2       | 3       |         |  |  |
| 3*018  | 24       | 41      | 49      | 54      | 29      | 41      | 17      | 22      | 14      | 1       | 0       | 4       | 2       | 9       | 2       | 3       |         |  |  |
| 2DL1   | 2DL1*022 | 34      | 35      | 54      | 57      | 27      | 44      | 24      | 22      | 18      | 0       | 0       | 0       | 0       | 0       | 0       | 0       |  |  |
|        | *001     |         |         |         |         |         |         |         |         |         | 39      | 9       | 38      | 47      | 65      | 25      | 53      |  |  |
|        | *002     |         |         |         |         |         |         |         |         |         | 39      | 9       | 38      | 47      | 65      | 25      | 53      |  |  |
|        | *003     |         |         |         |         |         |         |         |         |         | 38      | 8       | 37      | 46      | 63      | 25      | 53      |  |  |
|        | *004     |         |         |         |         |         |         |         |         |         | 15      | 3       | 15      | 18.5    | 25      | 10      | 21      |  |  |
|        | *005     |         |         |         |         |         |         |         |         |         | 38      | 8       | 37      | 46      | 63      | 25      | 53      |  |  |
|        | *006     |         |         |         |         |         |         |         |         |         | 19      | 4       | 18.5    | 23      | 31.5    | 12.5    | 26.5    |  |  |
|        | *007     |         |         |         |         |         |         |         |         |         | 15.5    | 3.5     | 15      | 18.5    | 25.5    | 10      | 21.5    |  |  |
|        | *008     |         |         |         |         |         |         |         |         |         | 8       | 2       | 7       | 9       | 13      | 5       | 11      |  |  |
|        | *009     |         |         |         |         |         |         |         |         |         | 38      | 8       | 37      | 46      | 63      | 25      | 53      |  |  |
|        | *010     |         |         |         |         |         |         |         |         |         | 30      | 6       | 30      | 37      | 50      | 20      | 42      |  |  |
|        | *011     |         |         |         |         |         |         |         |         |         | 15      | 3       | 15      | 18.5    | 25      | 10      | 21      |  |  |
|        | *012     |         |         |         |         |         |         |         |         |         | 36      | 8       | 35      | 44      | 59      | 23      | 50      |  |  |
|        | *014     |         |         |         |         |         |         |         |         |         | 1       | 0       | 1       | 1       | 1       | 0       | 1       |  |  |
|        | *020     |         |         |         |         |         |         |         |         |         | 50      | 11      | 48      | 61      | 77      | 33      | 66      |  |  |
|        | *021     |         |         |         |         |         |         |         |         |         | 24      | 2       | 25      | 25      | 44      | 17      | 39      |  |  |
|        | *023     |         |         |         |         |         |         |         |         |         | 46      | 9       | 45      | 58      | 74      | 31      | 67      |  |  |
|        | *024     |         |         |         |         |         |         |         |         |         | 14.5    | 3       | 14.5    | 18      | 24.5    | 9.5     | 20.5    |  |  |
| *025   |          |         |         |         |         |         |         |         |         | 21      | 4       | 20      | 25      | 34      | 14      | 29      |         |  |  |
| *026   |          |         |         |         |         |         |         |         |         | 0       | 0       | 0       | 0       | 0       | 0       | 0       |         |  |  |
| *035   |          |         |         |         |         |         |         |         |         | 15      | 3       | 15      | 18.5    | 25      | 10      | 21      |         |  |  |
| *036   |          |         |         |         |         |         |         |         |         | 39      | 9       | 38      | 47      | 65      | 25      | 53      |         |  |  |

Supplemental Figure1. Scoring matrices for calculating number of interactions (inset box) and interaction scores for centromeric and telomeric KIR.

| Cen     | Tel   | Centromeric (Cen) |      |      |      |       |        |      | Telomeric (Tel) |      |      |      |      |       |        | N |      |      |      |
|---------|-------|-------------------|------|------|------|-------|--------|------|-----------------|------|------|------|------|-------|--------|---|------|------|------|
|         |       | 3DL3              | 2DS2 | 2DL2 | 2DL3 | 2DLSB | 2DS3/5 | 2DP1 | 2DL1            | 3DP1 | 2DL4 | 3DL1 | 3DS1 | 2DL5A | 2DS3/5 |   | 2DS1 | 2DS4 | 3DL2 |
| A/A     | A/A   | 2                 |      |      | 2    |       |        | 2    | 2               | 2    | 2    | 2    |      |       |        |   | 2    | 2    | 294  |
|         | DEL7  | 1                 |      |      | 2    |       |        | 2    | 2               | 2    | 2    | 2    |      |       |        |   | 2    | 2    | 1    |
|         | DEL16 | 2                 |      |      | 2    |       |        | 2    | 2               | 2    | 2    | 2    |      |       |        |   | 1    | 1    | 2    |
| A/A     | A/B   | 2                 |      |      | 2    |       |        | 2    | 2               | 2    | 2    | 1    | 1    | 1     | 1      | 1 | 1    | 2    | 103  |
|         | DEL1  | 2                 |      |      | 2    |       |        | 2    | 1               | 1    | 1    | 1    | 1    | 1     | 1      | 1 | 1    | 2    | 6    |
|         | DEL17 | 2                 |      |      | 2    |       |        | 2    | 2               | 2    | 2    | 1    | 1    | 1     | 1      | 1 | 1    | 2    | 1    |
|         | DUP2  | 2                 |      |      | 2    |       |        | 3    | 3               | 3    | 3    | 1    | 2    | 2     | 2      | 1 | 1    | 2    | 7    |
|         | DUP3  | 2                 |      |      | 2    |       |        | 2    | 2               | 3    | 3    | 1    | 2    | 1     | 1      | 1 | 1    | 2    | 3    |
| A/A     | B/B   | 2                 |      |      | 2    |       |        | 2    | 2               | 2    | 2    |      | 2    | 2     | 2      | 2 |      | 2    | 8    |
|         | DUP4  | 2                 |      |      | 2    |       |        | 3    | 3               | 3    | 3    |      | 3    | 3     | 3      | 2 |      | 2    | 1    |
| A/B01   | A/A   | 2                 | 1    | 1    | 1    | 1     | 1      | 2    | 2               | 2    | 2    | 2    | 2    |       |        |   | 2    | 2    | 56   |
|         | DEL8  | 2                 | 1    | 1    | 1    | 1     | 1      | 2    | 2               | 2    | 2    | 2    | 2    |       |        |   | 2    | 2    | 2    |
| A/B01   | A/B   | 2                 | 1    | 1    | 1    | 1     | 1      | 2    | 2               | 2    | 2    | 1    | 1    | 1     | 1      | 1 | 1    | 2    | 59   |
|         | DEL10 | 2                 | 1    | 1    | 1    | 1     | 1      | 2    | 2               | 2    | 2    | 1    | 1    | 1     | 1      | 1 | 1    | 2    | 1    |
|         | DEL11 | 2                 | 1    | 1    | 1    | 1     | 1      | 2    | 2               | 2    | 2    | 1    | 1    | 1     | 1      | 1 | 1    | 2    | 1    |
|         | DUP5  | 2                 | 1    | 1    | 1    | 1     | 1      | 2    | 2               | 3    | 3    | 3    | 2    | 1     |        |   | 2    | 2    | 1    |
| A/B01   | B/B   | 2                 | 1    | 1    | 1    | 1     | 1      | 2    | 2               | 2    | 2    |      | 2    | 2     | 2      | 2 |      | 2    | 9    |
| A/B02   | A/A   | 2                 | 1    | 1    | 1    |       |        | 1    | 1               | 2    | 2    | 2    | 2    |       |        |   | 2    | 2    | 130  |
|         | DEL9  | 2                 | 1    | 1    | 1    |       |        | 2    | 2               | 2    | 2    | 2    | 2    |       |        |   | 2    | 2    | 3    |
| A/B02   | A/B   | 2                 | 1    | 1    | 1    |       |        | 1    | 1               | 2    | 2    | 1    | 1    | 1     | 1      | 1 | 1    | 2    | 65   |
|         | DEL2  | 2                 | 1    | 1    | 1    |       | 1      | 1    | 1               | 1    | 1    | 1    | 1    | 1     | 1      | 1 | 1    | 2    | 1    |
|         | DEL3  | 2                 | 1    | 1    | 1    |       | 1      | 1    | 1               | 1    | 1    | 1    | 1    | 1     | 1      | 1 | 1    | 2    | 1    |
|         | DEL4  | 2                 | 1    | 1    | 1    |       | 1      | 1    | 1               | 1    | 1    | 1    | 1    | 1     | 1      | 1 | 1    | 2    | 10   |
|         | DUP6  | 2                 | 1    | 1    | 1    |       | 1      | 1    | 1               | 3    | 3    | 2    | 1    | 1     | 1      | 1 | 2    | 2    | 1    |
|         | DUP7  | 2                 | 1    | 1    | 1    |       | 1      | 2    | 2               | 3    | 3    | 2    | 1    | 1     | 1      | 1 | 2    | 2    | 9    |
|         | DUP8  | 2                 | 1    | 1    | 1    |       | 1      | 1    | 1               | 3    | 3    | 1    | 2    | 1     | 1      | 1 | 1    | 2    | 1    |
|         | DUP9  | 2                 | 1    | 1    | 1    |       | 1      | 2    | 2               | 3    | 3    | 1    | 2    | 2     | 2      | 1 | 1    | 2    | 2    |
| A/B02   | B/B   | 2                 | 1    | 1    | 1    |       |        | 1    | 1               | 2    | 2    |      | 2    | 2     | 2      | 2 |      | 2    | 7    |
|         | DEL5  | 2                 | 1    | 1    | 1    |       | 1      | 1    | 1               | 1    | 1    |      | 1    | 1     | 2      | 2 |      | 2    | 1    |
| B01/B01 | A/A   | 2                 | 2    | 2    |      |       |        | 2    | 2               | 2    | 2    | 2    | 2    |       |        |   | 2    | 2    | 8    |
|         | DEL12 | 2                 | 2    | 1    |      |       |        | 1    | 1               | 2    | 2    | 2    | 2    |       |        |   | 2    | 2    | 1    |
|         | DEL13 | 2                 | 1    | 2    |      |       |        | 2    | 2               | 2    | 2    | 2    | 2    |       |        |   | 2    | 2    | 1    |
| B01/B01 | A/B   | 2                 | 2    | 2    |      |       |        | 2    | 2               | 2    | 2    | 2    | 1    | 1     | 1      | 1 | 1    | 2    | 5    |
| B01/B01 | B/B   | 2                 | 2    | 2    |      |       |        | 2    | 2               | 2    | 2    | 2    | 2    | 2     | 2      | 2 |      | 2    | 1    |
|         | DEL14 | 2                 | 2    | 1    |      |       |        | 1    | 1               | 2    | 2    | 2    | 2    | 2     | 2      | 2 |      | 2    | 1    |
| B01/B02 | A/A   | 2                 | 2    | 2    |      |       |        | 1    | 1               | 1    | 1    | 2    | 2    | 2     |        |   | 2    | 2    | 13   |
| B01/B02 | A/B   | 2                 | 2    | 2    |      |       |        | 1    | 1               | 1    | 1    | 2    | 2    | 1     | 1      | 1 | 1    | 2    | 23   |
|         | DEL15 | 2                 | 2    | 1    |      |       |        | 1    | 1               | 2    | 2    | 1    | 1    | 1     | 1      | 1 | 1    | 2    | 2    |
|         | DUP1  | 2                 | 2    | 2    |      |       |        | 1    | 1               | 3    | 3    | 2    | 1    | 1     | 1      | 1 | 2    | 2    | 3    |
|         | DUP10 | 2                 | 2    | 2    |      |       |        | 1    | 1               | 2    | 2    | 3    | 1    | 2     | 2      | 2 | 1    | 1    | 2    |
| B01/B02 | B/B   | 2                 | 2    | 2    |      |       |        | 1    | 1               | 1    | 1    | 2    | 2    | 2     | 2      | 2 |      | 2    | 6    |
| B02/B02 | A/A   | 2                 | 2    | 2    |      |       |        |      |                 | 2    | 2    | 2    |      |       |        |   | 2    | 2    | 25   |
| B02/B02 | A/B   | 2                 | 2    | 2    |      |       |        |      |                 | 2    | 2    | 1    | 1    | 1     | 1      | 1 | 1    | 2    | 9    |
|         | DEL6  | 2                 | 2    | 2    |      | 1     |        | 1    | 1               | 1    | 1    | 1    | 1    | 1     | 1      | 1 | 1    | 2    | 2    |
|         | DUP11 | 2                 | 2    | 2    |      |       |        | 3    | 3               | 3    | 3    | 1    | 2    | 2     | 2      | 1 | 1    | 2    | 2    |
| B02/B02 | B/B   | 2                 | 2    | 2    |      |       |        |      |                 | 2    | 2    |      | 2    | 2     | 2      | 2 |      | 2    | 0    |

**Supplemental Figure 2.** This figure shows the genotypes of the cohort. Those that diverged from those predicted by the common structural types shown in Figure 2A are indicated as 'DEL' for deletion and 'DUP' for duplication. Gene presence is indicated by a shaded square and the number indicates the copy number of the gene. Black squares match the assigned genotype for the final analyses. Gray squares indicate genes with copy numbers different from expected. N are the number of observations of that genotype in the dataset. The individual genotypes are grouped with the genotype that they were assigned for the analyses.



## CONTINUOUS

| Factor                             | Level    | Count | HRatio | HR Low | HR Up | Pvalue |
|------------------------------------|----------|-------|--------|--------|-------|--------|
| Cen genotype v1                    | *overall | 857   | 0.73   | 0.71   | 0.87  | <0.001 |
| Cen genotype v2                    | *overall | 857   | 0.78   | 0.71   | 0.87  | <0.001 |
| B segment count                    | *overall | 857   | 0.78   | 0.69   | 0.88  | 0.0001 |
| Inhibitory interactions (D:R)      | *overall | 853   | 1.01   | 0.94   | 1.09  | 0.7607 |
| Inhibitory interactions (D:D)      | *overall | 849   | 1.01   | 0.94   | 1.08  | 0.8315 |
| Cen interaction score (D:R)        | *overall | 857   | 1      | 1      | 1     | 0.3275 |
| Avg. Cen interaction score (D:R)   | *overall | 857   | 0.99   | 0.97   | 1.01  | 0.3667 |
| Tel interaction score (D:R)        | *overall | 857   | 1      | 1      | 1     | 0.549  |
| Avg. Tel interaction score (D:R)   | *overall | 857   | 0.99   | 0.98   | 1     | 0.1534 |
| Total interaction score (D:R)      | *overall | 857   | 1      | 1      | 1     | 0.966  |
| Avg. Total interaction score (D:R) | *overall | 857   | 0.98   | 0.96   | 1     | 0.1104 |
| Cen interaction score (D:D)        | *overall | 857   | 1      | 1      | 1.01  | 0.2091 |
| Avg. Cen interaction score (D:D)   | *overall | 857   | 0.99   | 0.97   | 1.02  | 0.5206 |
| Tel interaction score (D:D)        | *overall | 857   | 1      | 1      | 1     | 0.4636 |
| Avg. Tel interaction score (D:D)   | *overall | 857   | 0.99   | 0.98   | 1     | 0.1146 |
| Total interaction score (D:D)      | *overall | 857   | 1      | 1      | 1     | 0.923  |
| Avg. Total interaction score (D:D) | *overall | 857   | 0.98   | 0.96   | 1     | 0.1045 |

## CATEGORICAL

| Factor                                                    | Level        | COUNT    | HRatio | HR Low    | HR Up  | Pvalue |
|-----------------------------------------------------------|--------------|----------|--------|-----------|--------|--------|
| Cen genotype v1                                           | *overall     |          |        |           |        | 0.0009 |
|                                                           | A/A          | 408      | 1      |           |        |        |
|                                                           | A/B01        | 125      | 1      | 0.72      | 1.41   | 0.98   |
|                                                           | A/B02        | 222      | 0.77   | 0.58      | 1.04   | 0.0891 |
|                                                           | B01/B01      | 17       | 0.29   | 0.07      | 1.18   | 0.0832 |
|                                                           | B01/B02      | 45       | 0.23   | 0.09      | 0.56   | 0.0012 |
|                                                           | B02/B02      | 40       | 0.23   | 0.07      | 0.73   | 0.0122 |
| Cen genotype v2                                           | *overall     |          |        |           |        | 0.0003 |
|                                                           | A/A          | 408      | 1      |           |        |        |
|                                                           | A/B01        | 125      | 1      | 0.72      | 1.41   | 0.9807 |
|                                                           | A/B02        | 222      | 0.77   | 0.58      | 1.04   | 0.0892 |
|                                                           | B01/Bx       | 62       | 0.24   | 0.11      | 0.52   | 0.0003 |
|                                                           | B02/B02      | 40       | 0.23   | 0.07      | 0.73   | 0.0122 |
|                                                           | Tel genotype | *overall |        |           |        |        |
| A/A                                                       |              | 516      | 1      |           |        |        |
| A/B                                                       |              | 309      | 0.77   | 0.59      | 0.99   | 0.0448 |
| B/B                                                       |              | 32       | 0.7    | 0.34      | 1.42   | 0.3214 |
| 2DS4 expressed                                            | *overall     |          |        |           |        | 0.7647 |
|                                                           | expressed    | 521      | 1      |           |        |        |
| absent                                                    | 336          | 1.04     | 0.81   | 1.34      | 0.7647 |        |
| 3DL1 expressed                                            | *overall     |          |        |           |        | 0.7134 |
|                                                           | expressed    | 105      | 1      |           |        |        |
|                                                           | absent       | 752      | 0.93   | 0.65      | 1.34   | 0.7134 |
| B segment count v1                                        | *overall     |          |        |           |        | 0.0015 |
|                                                           | 0            | 284      | 1      |           |        |        |
|                                                           | 1            | 292      | 1.01   | 0.77      | 1.33   | 0.9443 |
|                                                           | 2            | 195      | 0.53   | 0.37      | 0.77   | 0.0007 |
|                                                           | 3            | 71       | 0.55   | 0.33      | 0.93   | 0.0246 |
| 4                                                         | 15           | 0        | 0      | 2.20E+247 | 0.9645 |        |
| B segment count v2                                        | *overall     |          |        |           |        | 0.0001 |
|                                                           | 0            | 284      | 1      |           |        |        |
|                                                           | 1            | 292      | 1.01   | 0.77      | 1.33   | 0.946  |
|                                                           | 2            | 195      | 0.53   | 0.37      | 0.77   | 0.0007 |
|                                                           | < 3          | 86       | 0.46   | 0.27      | 0.77   | 0.0029 |
| 3DL1:Bw4(recipient)                                       | *overall     |          |        |           |        | 0.6655 |
|                                                           | none         | 418      | 1      |           |        |        |
|                                                           | weak         | 226      | 0.94   | 0.7       | 1.26   | 0.6587 |
|                                                           | strong       | 213      | 1.09   | 0.82      | 1.46   | 0.5593 |
| 3DL1:Bw4(donor)                                           | *overall     |          |        |           |        | 0.6584 |
|                                                           | none         | 411      | 1      |           |        |        |
|                                                           | weak         | 238      | 0.96   | 0.72      | 1.28   | 0.7755 |
|                                                           | strong       | 208      | 1.11   | 0.83      | 1.49   | 0.4778 |
| Inhibitory interactions (D:R)<br>donor KIR: recipient HLA | *overall     |          |        |           |        | 0.6154 |
|                                                           | 10           | 53       | 0.83   | 0.45      | 1.54   | 0.5551 |
|                                                           | 4            | 156      | 1      |           |        |        |
|                                                           | 5            | 102      | 0.81   | 0.5       | 1.33   | 0.4089 |
|                                                           | 6            | 262      | 1.22   | 0.85      | 1.74   | 0.2816 |
|                                                           | 7            | 88       | 1.09   | 0.68      | 1.74   | 0.7163 |
|                                                           | 8            | 164      | 1.14   | 0.77      | 1.69   | 0.5194 |
|                                                           | 9            | 28       | 1.16   | 0.56      | 2.38   | 0.6946 |

## CATEGORICAL (continued)

| Factor                                                                     | Level                                                    | COUNT    | HRatio | HR Low | HR Up  | Pvalue |
|----------------------------------------------------------------------------|----------------------------------------------------------|----------|--------|--------|--------|--------|
| Activating interactions (D:R) v1<br>donor KIR: recipient HLA               | *overall                                                 |          |        |        |        | 0.6701 |
|                                                                            | 0                                                        | 502      | 1      |        |        |        |
|                                                                            | 1                                                        | 193      | 1.19   | 0.9    | 1.59   | 0.2243 |
|                                                                            | 2                                                        | 123      | 0.95   | 0.66   | 1.37   | 0.7938 |
|                                                                            | 3                                                        | 16       | 0.98   | 0.31   | 3.12   | 0.9787 |
| 4                                                                          | 20                                                       | 0.72     | 0.26   | 1.95   | 0.5144 |        |
| Activating interactions (D:R) v2<br>donor KIR: recipient HLA               | *overall                                                 |          |        |        |        | 0.5442 |
|                                                                            | 0                                                        | 502      | 1      |        |        |        |
| 1 or more                                                                  | 355                                                      | 1.08     | 0.84   | 1.38   | 0.5442 |        |
| Inhibitory interactions (D:D)<br>donor KIR: donor HLA                      | *overall                                                 |          |        |        |        | 0.171  |
|                                                                            | 10                                                       | 46       | 0.59   | 0.28   | 1.26   | 0.173  |
|                                                                            | 4                                                        | 159      | 1      |        |        |        |
|                                                                            | 5                                                        | 107      | 0.87   | 0.53   | 1.42   | 0.5783 |
|                                                                            | 6                                                        | 254      | 1.27   | 0.88   | 1.82   | 0.1987 |
|                                                                            | 7                                                        | 90       | 1.44   | 0.92   | 2.25   | 0.1078 |
|                                                                            | 8                                                        | 165      | 1.17   | 0.78   | 1.74   | 0.4481 |
|                                                                            | 9                                                        | 28       | 1.35   | 0.67   | 2.7    | 0.4008 |
|                                                                            | Activating interactions (D:D) v1<br>donor KIR: donor HLA | *overall |        |        |        |        |
| 0                                                                          |                                                          | 491      | 1      |        |        |        |
| 1                                                                          |                                                          | 207      | 1.34   | 1.01   | 1.77   | 0.0415 |
| 2                                                                          |                                                          | 125      | 0.93   | 0.65   | 1.35   | 0.7106 |
| 3                                                                          |                                                          | 16       | 1.12   | 0.41   | 3.04   | 0.82   |
| 4                                                                          | 15                                                       | 0.67     | 0.21   | 2.12   | 0.4934 |        |
| Activating interactions (D:D) v2<br>donor KIR: donor HLA                   | *overall                                                 |          |        |        |        | 0.2554 |
|                                                                            | 0                                                        | 491      | 1      |        |        |        |
| 1 or more                                                                  | 366                                                      | 1.15     | 0.9    | 1.47   | 0.2554 |        |
| Cen interaction score (D:R)<br>donor KIR: recipient HLA<br>tertiles        | *overall                                                 |          |        |        |        | 0.4526 |
|                                                                            | 0                                                        | 271      | 1      |        |        |        |
|                                                                            | 1                                                        | 296      | 0.83   | 0.61   | 1.12   | 0.2215 |
| 2                                                                          | 290                                                      | 0.94     | 0.7    | 1.27   | 0.704  |        |
| Avg. Cen interaction score (D:R)<br>donor KIR: recipient HLA<br>tertiles   | *overall                                                 |          |        |        |        | 0.2547 |
|                                                                            | 0                                                        | 285      | 1      |        |        |        |
|                                                                            | 1                                                        | 284      | 0.79   | 0.59   | 1.06   | 0.1098 |
| 2                                                                          | 288                                                      | 0.85     | 0.63   | 1.14   | 0.2664 |        |
| Tel interaction score (D:R)<br>donor KIR: recipient HLA<br>tertiles        | *overall                                                 |          |        |        |        | 0.6839 |
|                                                                            | 0                                                        | 286      | 1      |        |        |        |
|                                                                            | 1                                                        | 286      | 0.88   | 0.66   | 1.18   | 0.3912 |
| 2                                                                          | 285                                                      | 0.96     | 0.71   | 1.29   | 0.7809 |        |
| Avg. TelInteraction score (D:R)<br>donor KIR: recipient HLA<br>tertiles    | *overall                                                 |          |        |        |        | 0.3365 |
|                                                                            | 0                                                        | 287      | 1      |        |        |        |
|                                                                            | 1                                                        | 284      | 0.88   | 0.66   | 1.17   | 0.3809 |
| 2                                                                          | 286                                                      | 0.8      | 0.59   | 1.08   | 0.1453 |        |
| Total interaction score (D:R)<br>donor KIR: recipient HLA<br>tertiles      | *overall                                                 |          |        |        |        | 0.5445 |
|                                                                            | 0                                                        | 287      | 1      |        |        |        |
|                                                                            | 1                                                        | 284      | 0.85   | 0.63   | 1.16   | 0.3129 |
| 2                                                                          | 286                                                      | 0.99     | 0.74   | 1.32   | 0.9209 |        |
| Avg. Total interaction score (D:R)<br>donor KIR: recipient HLA<br>tertiles | *overall                                                 |          |        |        |        | 0.7497 |
|                                                                            | 0                                                        | 287      | 1      |        |        |        |
|                                                                            | 1                                                        | 287      | 0.98   | 0.73   | 1.32   | 0.8835 |
| 2                                                                          | 283                                                      | 0.9      | 0.67   | 1.2    | 0.4703 |        |
| Cen interaction score (D:D)<br>donor KIR: donor HLA<br>tertiles            | *overall                                                 |          |        |        |        | 0.5967 |
|                                                                            | 0                                                        | 281      | 1      |        |        |        |
|                                                                            | 1                                                        | 293      | 0.87   | 0.65   | 1.18   | 0.3677 |
| 2                                                                          | 283                                                      | 0.99     | 0.74   | 1.33   | 0.9537 |        |
| Avg. Cen interaction score (D:D)<br>donor KIR: donor HLA<br>tertiles       | *overall                                                 |          |        |        |        | 0.6677 |
|                                                                            | 0                                                        | 284      | 1      |        |        |        |
|                                                                            | 1                                                        | 284      | 0.89   | 0.67   | 1.19   | 0.4311 |
| 2                                                                          | 289                                                      | 0.89     | 0.66   | 1.2    | 0.4504 |        |
| Tel interaction score (D:D)<br>donor KIR: donor HLA<br>tertiles            | *overall                                                 |          |        |        |        | 0.7427 |
|                                                                            | 0                                                        | 277      | 1      |        |        |        |
|                                                                            | 1                                                        | 297      | 0.9    | 0.67   | 1.21   | 0.4824 |
| 2                                                                          | 283                                                      | 0.99     | 0.73   | 1.33   | 0.9371 |        |
| Avg. Tel interaction score (D:D)<br>donor KIR: donor HLA<br>tertiles       | *overall                                                 |          |        |        |        | 0.5458 |
|                                                                            | 0                                                        | 278      | 1      |        |        |        |
|                                                                            | 1                                                        | 296      | 0.9    | 0.67   | 1.21   | 0.4949 |
| 2                                                                          | 283                                                      | 0.85     | 0.63   | 1.14   | 0.2785 |        |
| Total interaction score (D:D)<br>donor KIR: donor HLA<br>tertiles          | *overall                                                 |          |        |        |        | 0.8315 |
|                                                                            | 0                                                        | 289      | 1      |        |        |        |
|                                                                            | 1                                                        | 283      | 0.91   | 0.68   | 1.23   | 0.5438 |
| 2                                                                          | 285                                                      | 0.96     | 0.71   | 1.29   | 0.7833 |        |
| Avg. Total interaction score (D:D)<br>donor KIR: donor HLA<br>tertiles     | *overall                                                 |          |        |        |        | 0.375  |
|                                                                            | 0                                                        | 289      | 1      |        |        |        |
|                                                                            | 1                                                        | 287      | 0.81   | 0.6    | 1.09   | 0.1643 |
| 2                                                                          | 281                                                      | 0.89     | 0.66   | 1.19   | 0.4318 |        |

Supplemental Figure 4. Results of statistical analyses with the endpoint of relapse. Significant overall results are highlighted in gold. The telomeric, centromeric and total interaction scores were analyzed as both continuous variables and discretized into tertiles and analyzed as categorical variables.
